# Supplementary material
Source: Springer Nature journal article supplement (https://www.springermedizin.de/resource/supplementary/12936_2012_2444_MOESM11_ESM.pdf/9542874)

Pyronaridine ( $C_{29}H_{32}N_5O_2Cl$ )

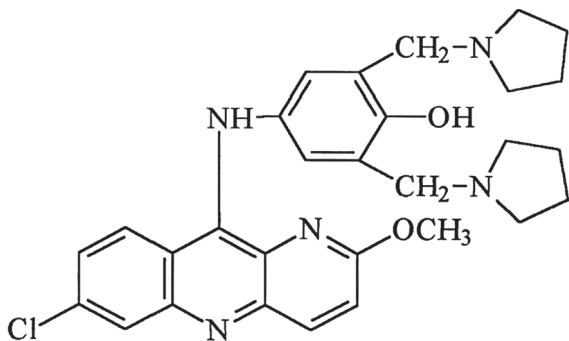

Mepacrine

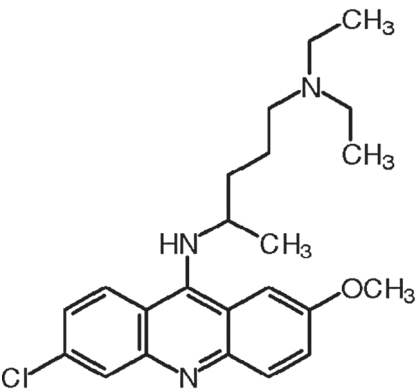

Amodiaquine

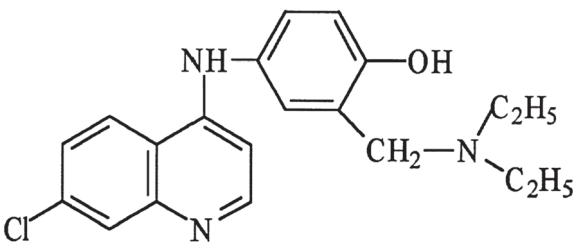

Supplement: MOESM11 [file 9542874]
